# Supplementary material for: Reduced Glucose Sensation Can Increase the Fitness of Saccharomyces cerevisiae Lacking Mitochondrial DNA
Source: PubMed Central journal article supplement (PMC4709096; doi:10.1371/journal.pone.0146511), 2016-01-11

A

% cells with mitochondrial DNA

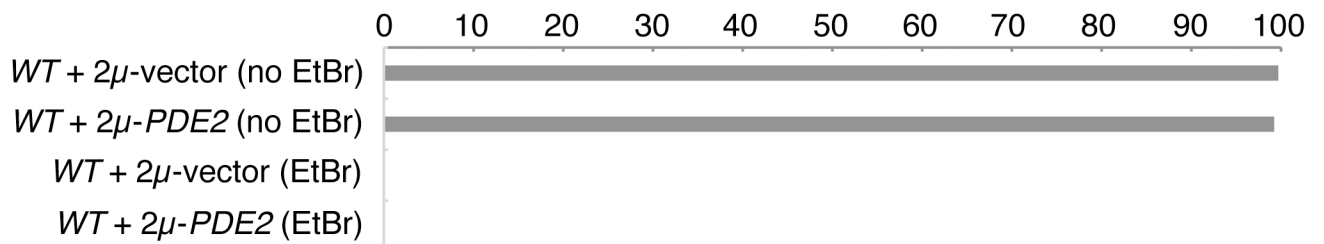

B

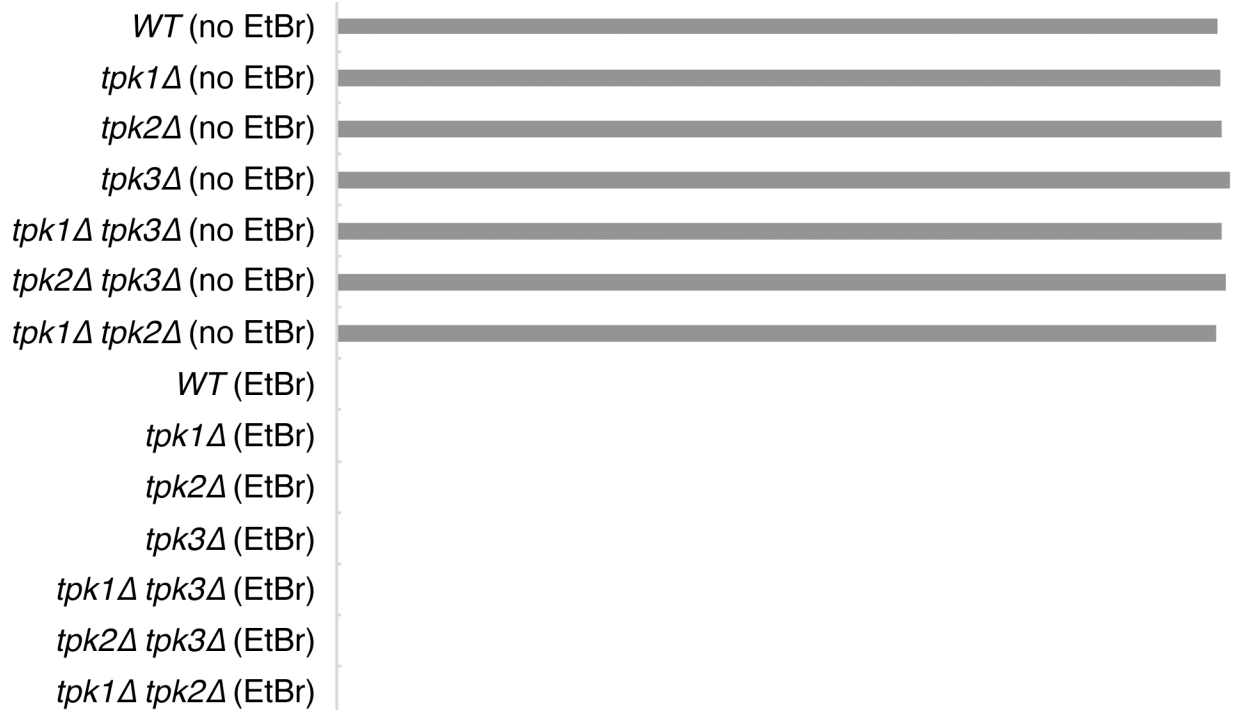

C

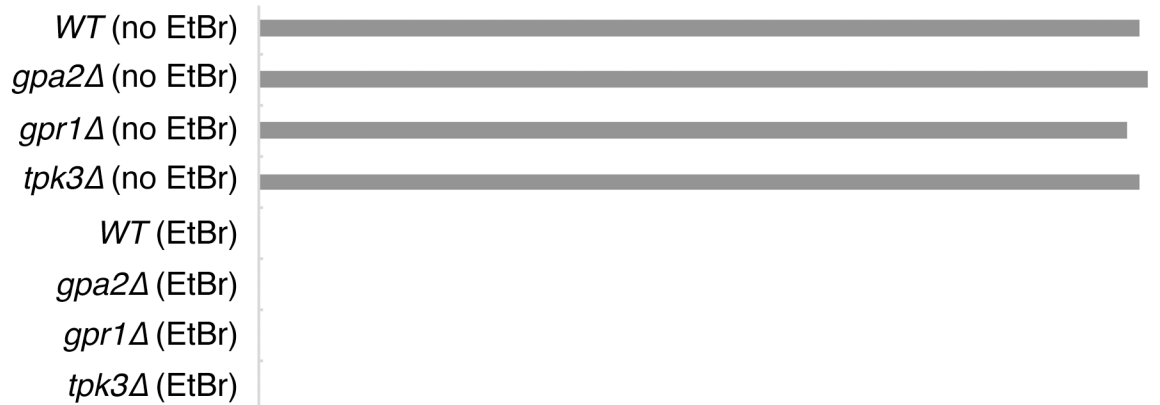

D

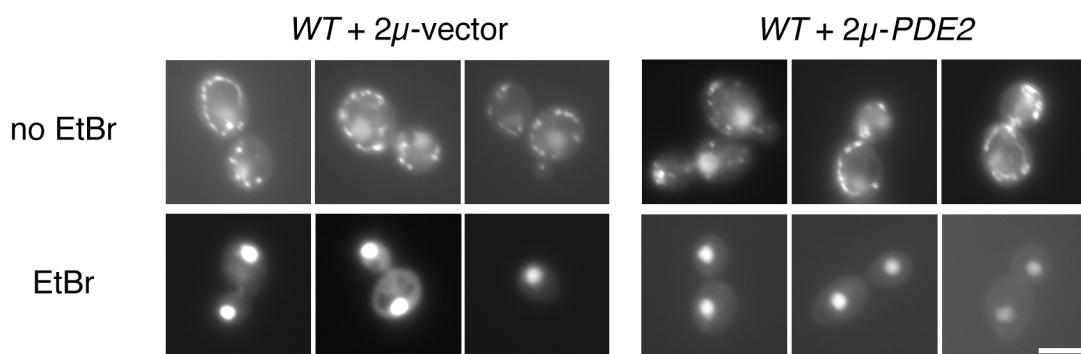

Supplement: pone.0146511.s002.pdf [file pone.0146511.s002.pdf]
