# Supplementary material for: Reduced Glucose Sensation Can Increase the Fitness of Saccharomyces cerevisiae Lacking Mitochondrial DNA
Source: PubMed Central journal article supplement (PMC4709096; doi:10.1371/journal.pone.0146511), 2016-01-11
Supplement: pone.0146511.s003.pdf [file pone.0146511.s003.pdf]

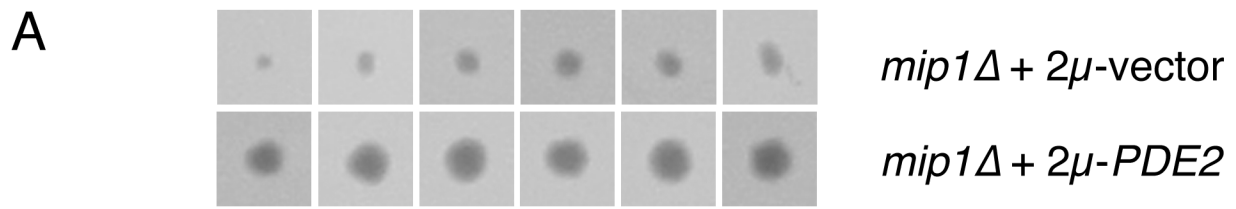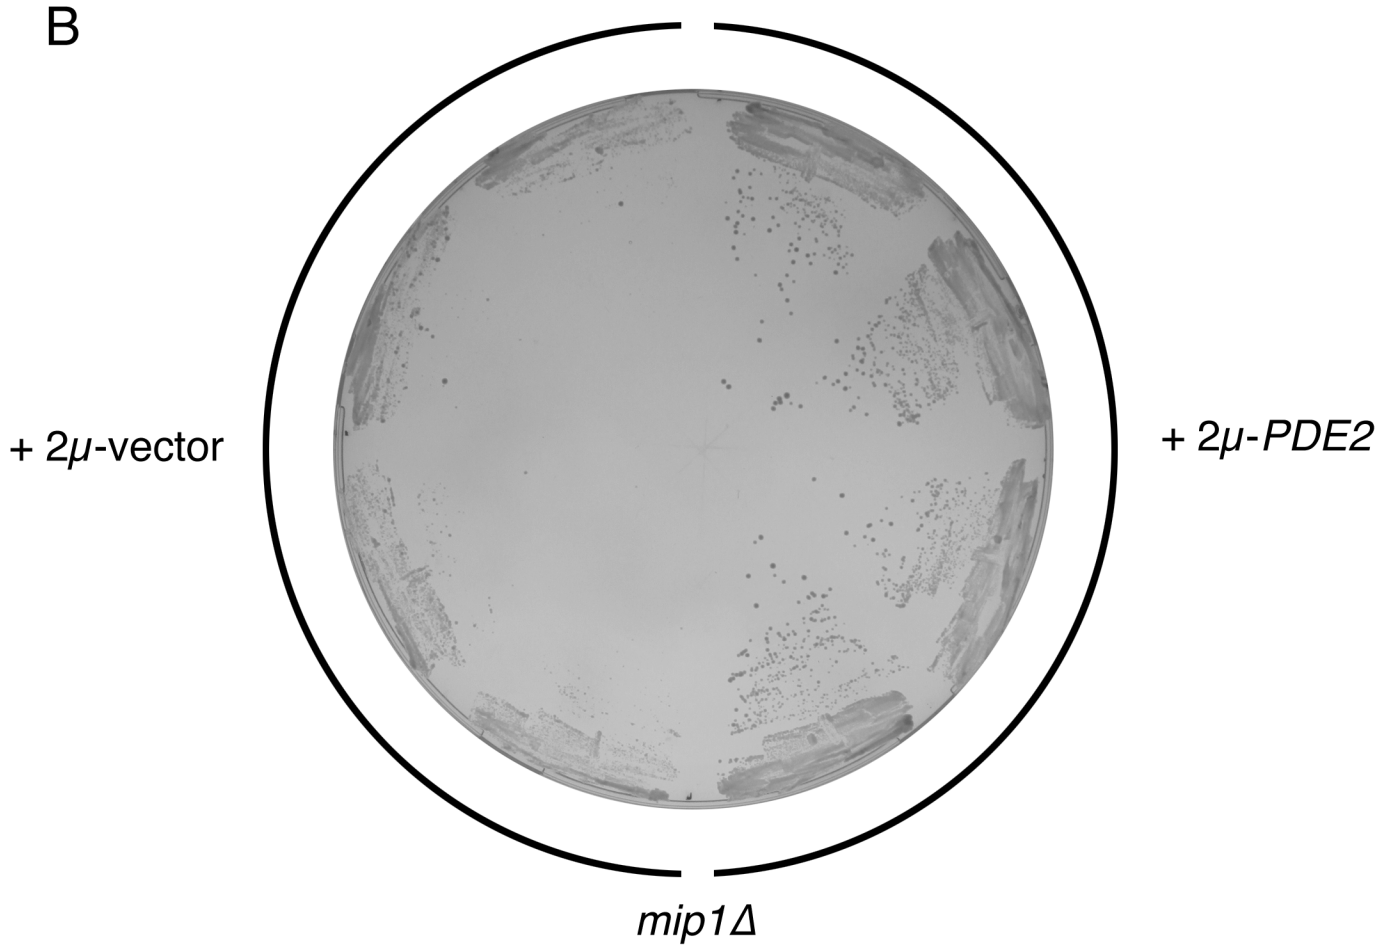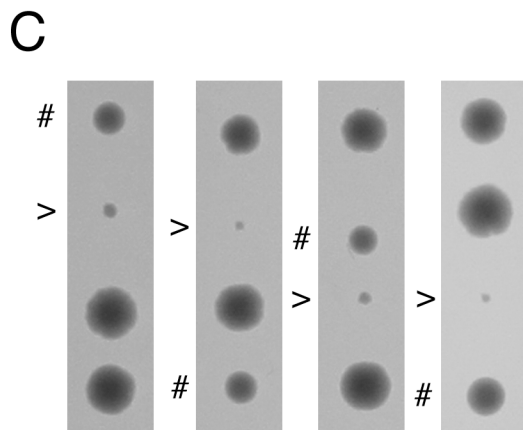

> *mip1Δ*  
# *mip1Δ gpa2Δ*

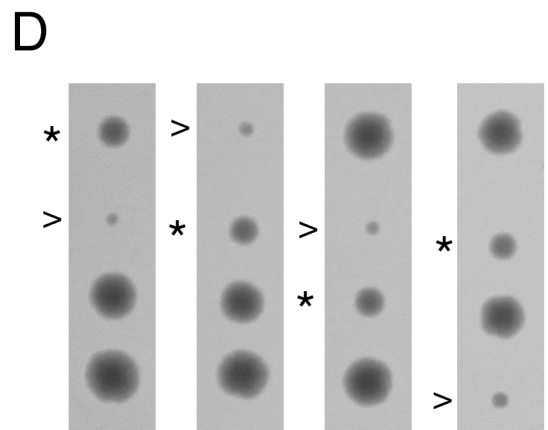

> *mip1Δ*  
\* *mip1Δ gpr1Δ*
